# Supplementary material for: Synthesis, characterization and application of luminescent silica nanomaterials
Source: Royal Society of Chemistry journal article supplement (doi:10.1039/c6tc03677e), 2016-01-01
Supplement: c6tc03677e1.pdf [file c6tc03677e1.pdf]

## Supporting Information

### **Synthesis, Characterization and Application of Luminescent Silica Nanomaterials**

Deepa Sriramulu,<sup>a</sup> Shuvan Prashant Turaga,<sup>b</sup> Ang Xin Yi,<sup>a</sup> Andrew Anthony Bettiol,<sup>b</sup> and Suresh Valiyaveetil,<sup>a\*</sup>

<sup>a</sup>Department of Chemistry, National University of Singapore, 3 Science Drive 3,  
Singapore 117543

<sup>b</sup>Department of Physics, National University of Singapore, 2 Science Drive 3,  
Singapore 117542

\*Email: [chmsv@nus.edu.sg](mailto:chmsv@nus.edu.sg)

### S1. Synthesis of Zinc Oxide Nanoparticles (ZnO NPs)

ZnO nanoparticles were synthesized based on a reported procedure. Zn(OAc)<sub>2</sub> solution (0.1 M, 50 mL) and polyvinylpyrrolidone (PVP) (0.05 M, 50 mL) solutions were mixed under continuous stirring. LiOH solution (1.0 M) was added dropwise to adjust the pH to 12 and the reaction was allowed to proceed for 3 hrs under reflux condition, cooled to room temperature before centrifuging for 15 mins to collect the solid ZnO particles. The particles were washed twice with ethanol (30 ml) and water (30 ml) before drying in an oven at 70 °C for 6 hrs.

**Table S1. Summary of reactants used for the synthesis of ZnOSiO<sub>2</sub> NPs of different Zn<sup>2+</sup> Loading.**

| Sample                      | No. of moles of Zn <sup>2+</sup> added (mmol) | No. of moles of AEAPTMS added (mmol) | Volume of NH <sub>4</sub> OH added (μL) | Volume of TEOS added (μL) |
|-----------------------------|-----------------------------------------------|--------------------------------------|-----------------------------------------|---------------------------|
| <b>ZnOSiO<sub>2</sub>-1</b> | 0.075                                         | 0.075                                | 600                                     | 400                       |
| <b>ZnOSiO<sub>2</sub>-2</b> | 0.15                                          | 0.15                                 | 600                                     | 400                       |
| <b>ZnOSiO<sub>2</sub>-3</b> | 0.30                                          | 0.15                                 | 600                                     | 400                       |
| <b>ZnOSiO<sub>2</sub>-4</b> | 0.45                                          | 0.15                                 | 600                                     | 600                       |
| <b>ZnOSiO<sub>2</sub>-A</b> | 0.45                                          | -                                    | 600                                     | 600                       |

ZnOSiO<sub>2</sub>-1, ZnOSiO<sub>2</sub>-2, ZnOSiO<sub>2</sub>-3, ZnOSiO<sub>2</sub>-4 refers to different amount of Zn in silica nanoparticles in the presence of AEAPTMS and sample ZnOSiO<sub>2</sub>-A refers to Zn loaded in silica nanoparticles in the absence of AEAPTMS

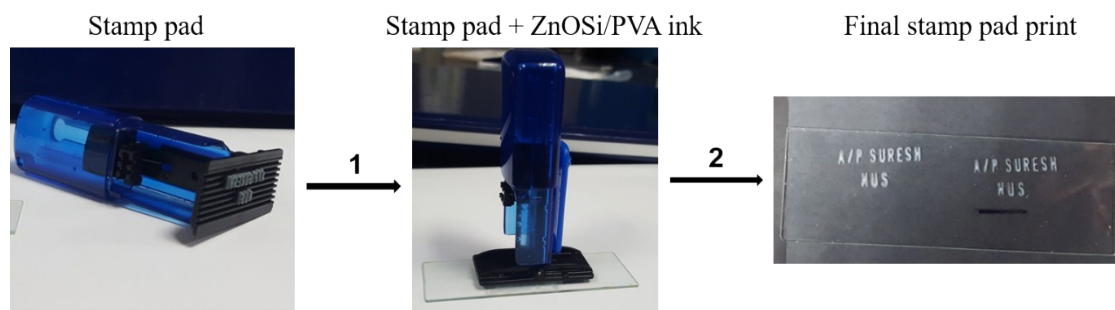

**Fig. S1** Demonstration to show the printing process by stamp pad method. Required print is created on stamp pad and pressed on glass plate smeared with ZnOSiO<sub>2</sub>/PVA formulated ink (1) for 5-10 seconds and transferred to clean glass slide to get the desired pattern on glass substrate (2).

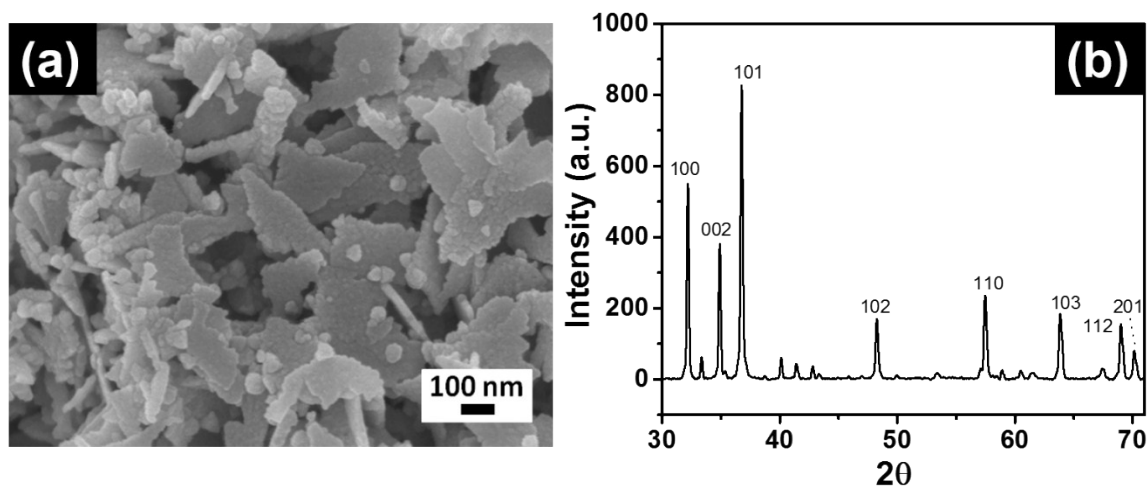

**Fig. S2** SEM image (a) and XRD pattern (b) of bare ZnO NPs.

**Table S2. Elemental Analysis of ZnOSiO<sub>2</sub> NPs.**

| Sample                 | Zn (wt %) | Si (wt %) |
|------------------------|-----------|-----------|
| ZnOSiO <sub>2</sub> -1 | 3.28      | 45.48     |
| ZnOSiO <sub>2</sub> -2 | 4.88      | 27.88     |
| ZnOSiO <sub>2</sub> -3 | 7.98      | 27.26     |
| ZnOSiO <sub>2</sub> -4 | 11.50     | 17.45     |
| ZnOSiO <sub>2</sub> -A | 9.01      | 19.47     |

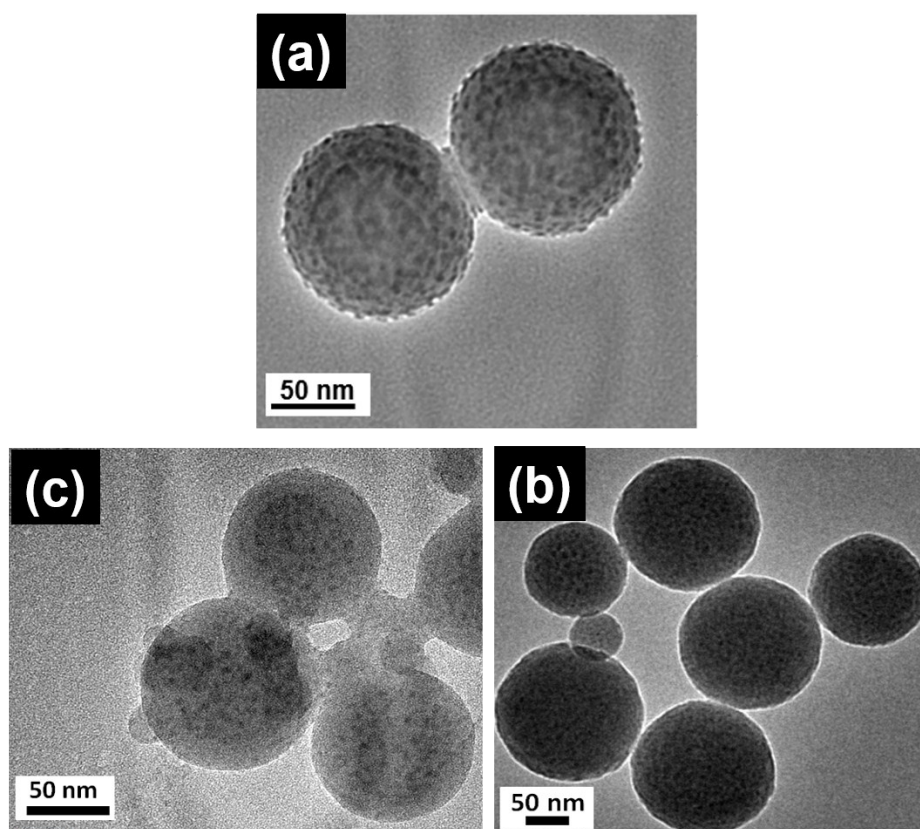

**Fig. S3** TEM images of (a) ZnOSiO<sub>2</sub>-A, (b) ZnOSiO<sub>2</sub>-1 and (c) ZnOSiO<sub>2</sub>-4 to show distribution of ZnO in silica matrix.

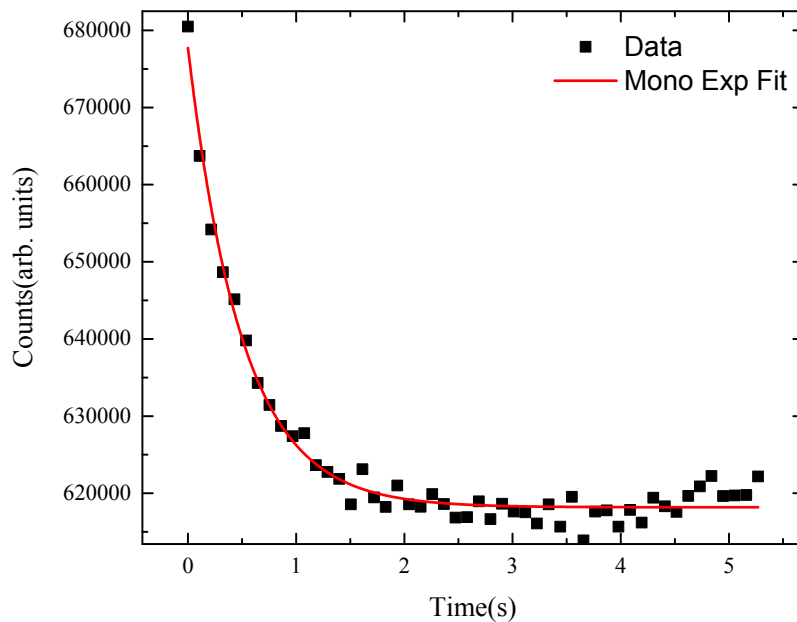

**Fig. S4** Phosphorescence life time of ZnOSiO<sub>2</sub> – 4 nanoparticles using 405 nm as excitation wavelength.

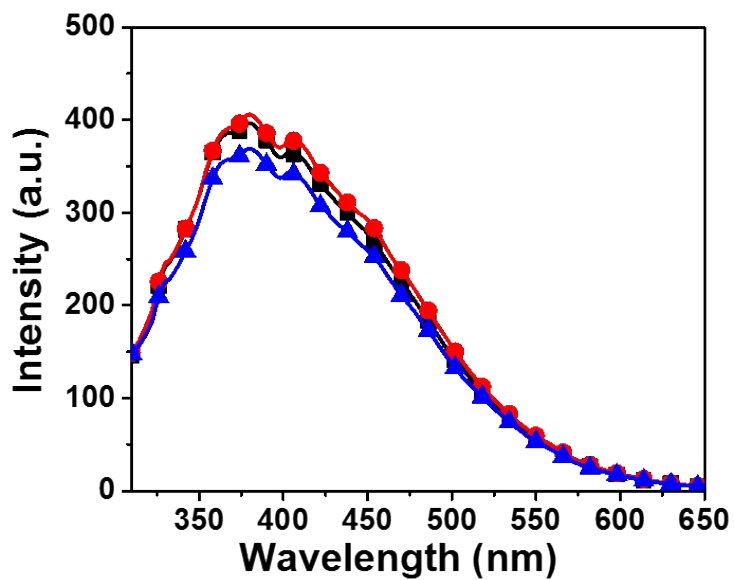

**Fig. S5** Thermal Stability of ZnOSiO<sub>2</sub> - 1/PVA film on glass substrate heated at 100 deg at different interval of time, (■) 0 hr, (●) 1 hr, (▲) 48 hr. ( $\lambda_{ex} = 300$  nm)
